# Supplementary material
Source: Springer Nature journal article supplement (https://www.springermedizin.de/resource/supplementary/13020_2011_136_MOESM1_ESM.pdf/9641054)
Supplement: MOESM1 [file 9641054]

AF453357 GTCTTGACAGCATCAAAGCTAGCATTGAAGCTCGAAAGCCTGATTTTGAT 50  
 Sample\_A -----GCCTGATTTTGAT 13  
 Lodoicea\_maldivica\_RM -----

AF453357 GCTTATGTTGGTATGTCACCTTGCCCCAGCACCTAGTTGTTAGTACTTGA 100  
 Sample\_A GCTTATGTTGGTATGTCACCTTGCCCCAGCACCTAGTTGTTAGTACTTGA 63  
 Lodoicea\_maldivica\_RM -----

AF453357 AGAATTGGCAGTGCACCTTATTTGTTGGTGTAAATATAGAGCATTGCCATTA 150  
 Sample\_A AGAATTGGCAGTGCACCTTATTTGTTGGTGTAAATATAGAGCATTGCCATTA 113  
 Lodoicea\_maldivica\_RM -----GGCAGTGCACCTTATTTGTTGGTGTAAATATAGAGCATTGCCATTA 44  
 \*\*\*\*\*

AF453357 GTGGTGATTGATATATATAGTAATCTACTTCTATATATAGCAAATGCTTC 200  
 Sample\_A GTGGTGATTGATATATATAGTAATCTACTTCTATATATAGCAAATGCTTC 163  
 Lodoicea\_maldivica\_RM GTGGTGATTGATATATATAGTAATCTACTTCTATATATAGCAAATGCTTC 94  
 \*\*\*\*\*

AF453357 ATAAATAAACTAACCTAATAAAACAAAGGATCTGATCGATAA--GTCAAAT 248  
 Sample\_A ATAAATAAACTAACCTAATAAAACAAAGGATCTGATCGATAAAGGTCAAAT 213  
 Lodoicea\_maldivica\_RM ATAAATAAACTAACCTAATAAAACAAAGGATCTGATCGATAAAGGTCAAAT 144  
 \*\*\*\*\* \*\*\*\*\*

AF453357 AATGCACAAAACATACTGGACTCAAAATATACTCTTACTTCATGTGCAAT 298  
 Sample\_A AATGCACAAAACATACTGGACTCAAAATATACTCTTACTTCATGTGCAAT 263  
 Lodoicea\_maldivica\_RM AATGCACAAAACATACTGGACTCAAAATATACTCTTACTTCATGTGCAAT 194  
 \*\*\*\*\*

AF453357 TTTTGTGACACCTGTTTTTTTCAAAAAAAGAAAGGAGAGGGAGGGAGGG 348  
 Sample\_A TTTTGTGACACCTGTTTTTTTCAAAAAAAGAAAGGAGAGGGAGGGAGGG 313  
 Lodoicea\_maldivica\_RM TTTTGTGACACCTGTTTTTTTCAAAAAAAGAAAGGAGAGGGAGGGAGGG 244  
 \*\*\*\*\*

AF453357 TGAGAGTCACCTGATTCATTGAAATAATGAGACAAGTAGATATGTTGCAT 398  
 Sample\_A TGAGAGTCACCTGATTCATTGAAATAATGAGACAAGTAGATATGTTGCAT 363  
 Lodoicea\_maldivica\_RM TGAGAGTCACCTGATTCATTGAAATAATGAGACAAGTAGTTATGTTGCAT 294  
 \*\*\*\*\*

AF453357 CTCATGTTCTTCAGATATCTGAATATCCATTCTTTCTTTAGCACTCTTGG 448  
 Sample\_A CTCATGTTCTTCAGATATCTGAATATCCATTCTTTCTTTAGCACTCTTGG 413  
 Lodoicea\_maldivica\_RM CTCATGTTCTTCAGATATCTGAATATCCATTCTTTCTTTAGCACTCTTGG 344  
 \*\*\*\*\*

AF453357 ATTACTGACAGCTTGTAGGTTGCTGCCCTTGGCAGAGCCGCAGAAGCAAT 498  
 Sample\_A ATTACTGACAGCTTGTAGGTTGCTGCCCTTGGCAGAGCCGCAGAAGCAAT 463  
 Lodoicea\_maldivica\_RM ATTACTGACAGCTTGTAGGTTGCTGCCCTTGGCAGAGCCGCAGAAGCAAT 394  
 \*\*\*\*\*

AF453357 ATGCTGATGTCGTAATCGAAGTTTACCGACACAATTAATTCCTGGTGAC 548  
 Sample\_A ATGCTGATGTCGTAATCGAAGTTTACCGACACAATTAATTCCTGGTGAC 513  
 Lodoicea\_maldivica\_RM ATGCTGATGTCGTAATCGAAGTTTACCGACACAATTAATTCCTGGTGAC 444  
 \*\*\*\*\*

AF453357 AAAGAAAGGAAGGTGCTGAGAGTTCGATTGGTGTGCAAGAAGGGGTGAA 598  
 Sample\_A AAAGAAAGGAAGGTGCTGAGAGTTCGA----- 540  
 Lodoicea\_maldivica\_RM AAAGAAAGGAAG----- 456  
 \*\*\*\*\*
